# Supplementary material for: A microwell array structured surface plasmon resonance imaging gold chip for high-performance label-free immunoassay
Source: Royal Society of Chemistry journal article supplement (doi:10.1039/d0an01169j), 2020-01-01
Supplement: d0an01169j1.pdf [file d0an01169j1.pdf]

Electronic Supplementary Information

# Microwell array structured surface plasmon resonance imaging gold chip for high performance label-free immunoassay

Yihong Mei, Ling Li, Nan Chen, Changyin Zhong and Weihua Hu\*

Institute for Clean Energy & Advanced Materials, School of Materials & Energy,  
Southwest University, Chongqing 400715, China

\*Corresponding authors: E-mail: [whhu@swu.edu.cn](mailto:whhu@swu.edu.cn) (W.H. Hu)

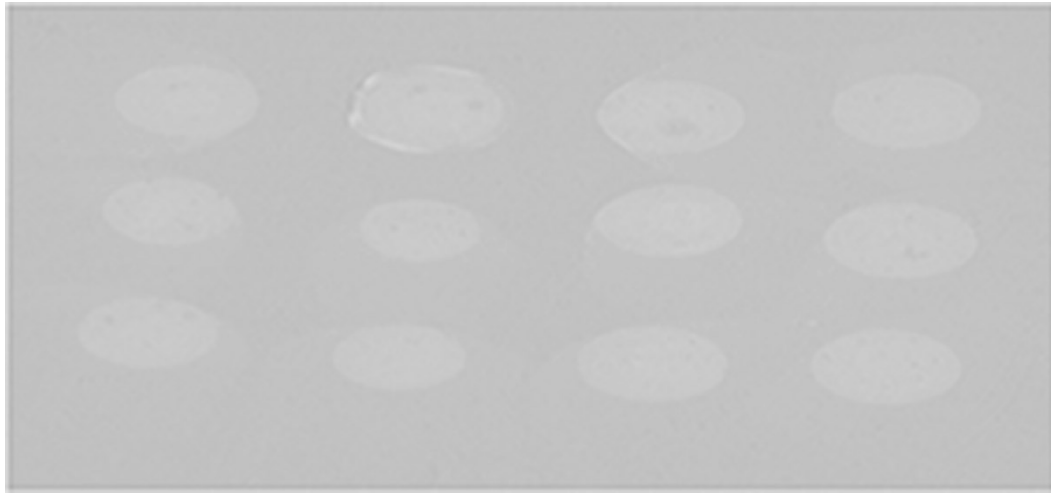

**Fig. S1** differential SPRi image obtained on conventional gold chip after 20 min reaction with 100 µg mL<sup>-1</sup> OTA antibody solution.

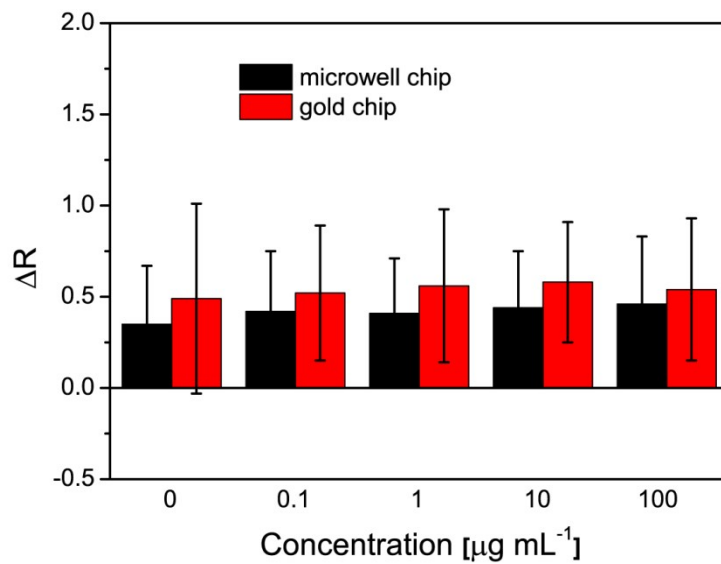

**Fig. S2** Comparison of SPRi noises (signals collected on BSA-immobilized control spots) on microwell array structured chip and conventional gold chip after 20 min detection of OTA antibody at different concentration.
